# Supplementary material for: Revisiting the coordination chemistry for preparing manganese oxide nanocrystals in the presence of oleylamine and oleic acid
Source: Royal Society of Chemistry journal article supplement (doi:10.1039/c4nr00761a), 2014-01-01
Supplement: c4nr00761a1.pdf [file c4nr00761a1.pdf]

Electronic Supplementary Information

**Revisiting the Coordination Chemistry for Preparing Manganese Oxide Nanocrystals  
in the Presence of Oleylamine and Oleic Acid**

Hongwei Zhang<sup>a</sup>, Lihong Jing<sup>a</sup>, Jianfeng Zeng<sup>a</sup>, Yi Hou<sup>a</sup>, Zhen Li<sup>\*b</sup>, and Mingyuan Gao<sup>\*a</sup>

<sup>a</sup>*Institute of Chemistry, Chinese Academy of Sciences, Bei Yi Jie 2, Zhong Guan Cun, Beijing 100190, China.*

<sup>b</sup>*School of Radiation Medicine and Radiation Protection, Soochow University, 199 Ren-Ai Road, Suzhou Industrial Park, Suzhou 215123, China*

To identify the crystalline structure of the tiny spherical particles shown in Figure 1b, SAED and HRTEM measurements were carried out. The results shown in **Figure S1** suggest the tiny spherical particles are tetragonal Mn<sub>3</sub>O<sub>4</sub>.

The four-arm branched particles shown in Figure 1e also appeared as six-arm stars and even formed self-organized superstructures as shown in **Figure S2**.

The nanoparticles obtained after incubating the reaction mixture of Mn(Ac)<sub>2</sub> and oleylamine at a molar ratio of 1:10 at 100 °C under N<sub>2</sub> atmosphere for 9 h and the corresponding electron diffraction results are shown in **Figure S3**.

By quickly heating a stock solution containing Mn(Ac)<sub>2</sub>, oleylamine, oleic acid, and ODE up to 250 °C within 17 min, particles with an average size of 4.2 nm were obtained at 250 °C at a reaction time of 20 min. The TEM results are provided in **Figure S4**.

The temporal evolution of size and size distribution of Mn<sub>3</sub>O<sub>4</sub> and MnO nanocrystals formed in the system yielding branched MnO nanocrystals (Figure 1e) upon prolonged reaction are shown in **Figure S5**.

The temporal evolutions of size and size distribution of Mn<sub>3</sub>O<sub>4</sub> and MnO nanocrystals obtained upon a post-treatment of the branched MnO nanocrystals in oleylamine are shown in **Figure S6**.

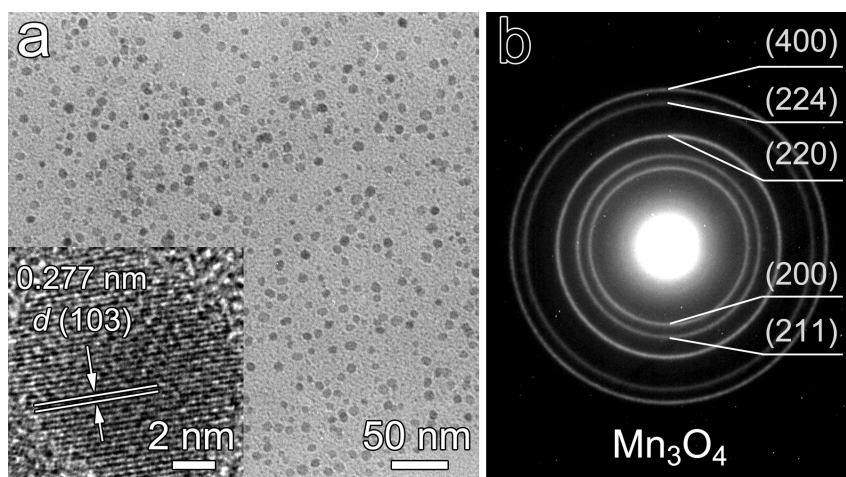

**Figure S1.** TEM image (a) of the tiny particles shown in Figure 1b together with the corresponding electron diffraction patterns (b). Inset: HRTEM image of an individual particle overlaid with crystal plane identifications according to JCPDS card (24-0734) for tetragonal  $\text{Mn}_3\text{O}_4$ . The diffraction rings are labeled with Miller indices according to standard data for tetragonal  $\text{Mn}_3\text{O}_4$ .

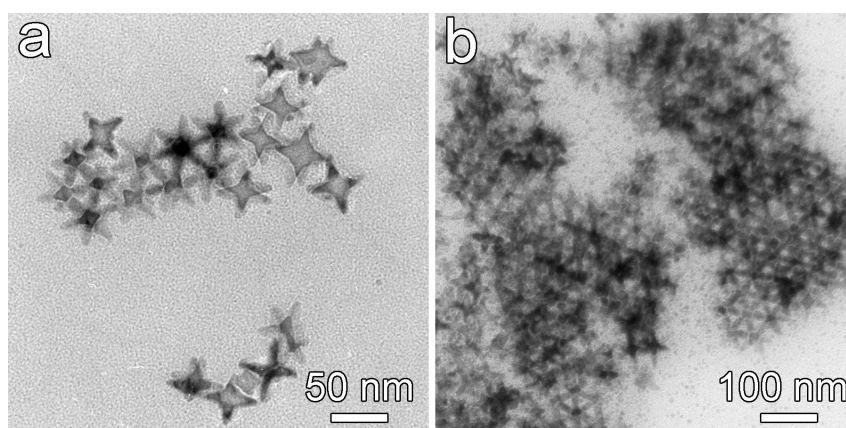

**Figure S2.** TEM images of branched particles showing self-organized superstructures in some locations on the TEM grid.

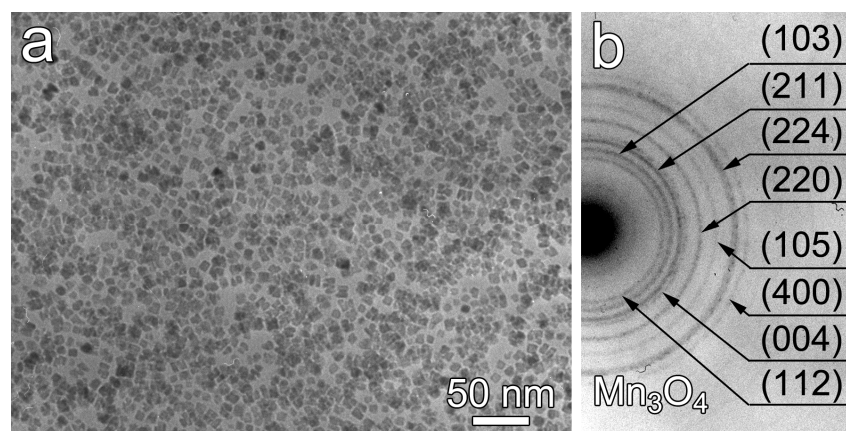

**Figure S3.** TEM image (a) of the particles obtained by pyrolysis of  $\text{Mn}(\text{Ac})_2$  in oleylamine at 100 °C for 9 h together with the corresponding electron diffraction pattern (b). The diffraction rings are labeled with Miller indices according to tetragonal  $\text{Mn}_3\text{O}_4$  (JCPDS 24-0734).

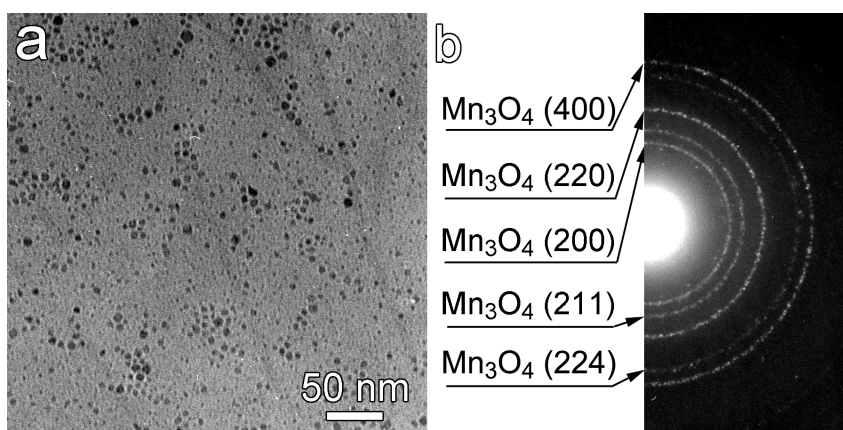

**Figure S4.** TEM image (a) and the corresponding electron diffraction pattern (b) of the particles obtained by pyrolysis of  $\text{Mn}(\text{Ac})_2$  in ODE containing oleylamine and oleic acid at 250 °C for 20 min upon directly heating the reaction mixture up to 250 °C within 17 min. The diffraction rings are labeled with Miller indices according to tetragonal  $\text{Mn}_3\text{O}_4$  (JCPDS 24-0734).

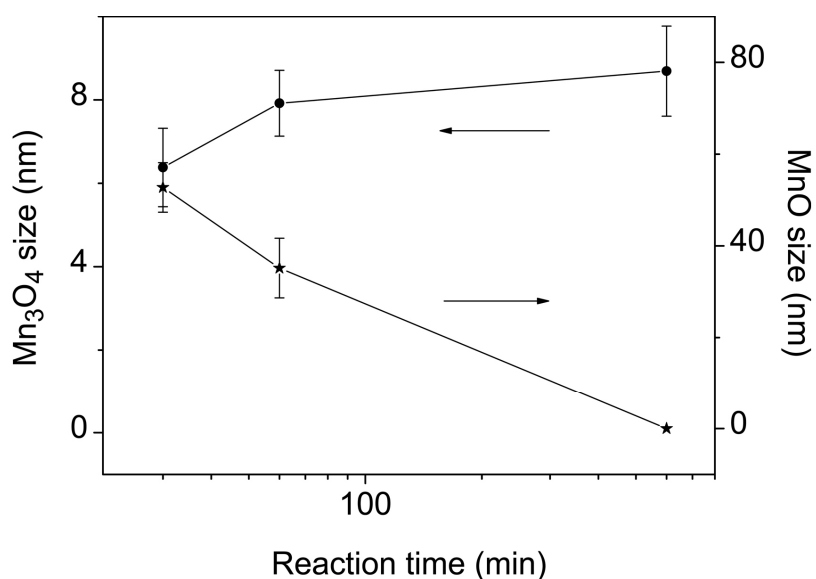

**Figure S5.** Temporal evolution of size and size distribution of  $\text{Mn}_3\text{O}_4$  and MnO nanocrystals formed in the system yielding branched MnO nanocrystals (Figure 1e) upon prolonged reaction.

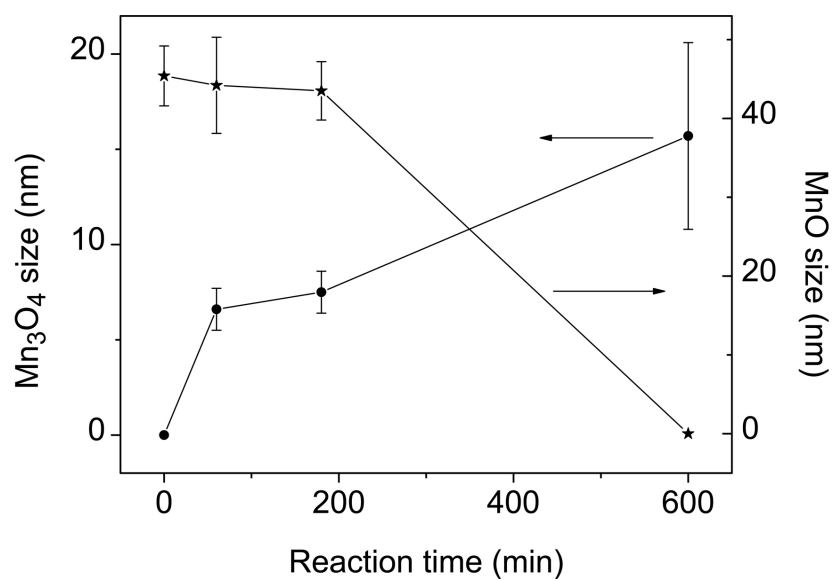

**Figure S6.** Temporal evolutions of size and size distribution of  $\text{Mn}_3\text{O}_4$  and  $\text{MnO}$  nanocrystals obtained upon a post-treatment of the branched  $\text{MnO}$  nanocrystals in oleylamine.
